# Supplementary material for: Identification and characterization of extrachromosomal circular DNA in age-related osteoporosis
Source: publisher site journal article supplement (doi:10.18632/aging.205388), 2023-12-29
Supplement: Supplementary file [file aging-v15i24-205388-supplementary-material-SD2.pdf]

## SUPPLEMENTARY TABLES

**Supplementary Table 1. Patient's information.**

| Traits      | OP    |       |       |       |      |       | N     |       |       |       |       |       |
|-------------|-------|-------|-------|-------|------|-------|-------|-------|-------|-------|-------|-------|
|             | 1     | 2     | 3     | 4     | 5    | 6     | 1     | 2     | 3     | 4     | 5     | 6     |
| Age (years) | 52    | 74    | 73    | 72    | 75   | 67    | 52    | 74    | 69    | 69    | 69    | 67    |
| Gender      | male  | male  | male  | male  | male | male  | male  | male  | male  | male  | male  | male  |
| BMD         | 75.2  | 70.9  | 76.6  | 72    | 76.3 | 46.3  | 147.9 | 120.4 | 120.1 | 120.1 | 120   | 143.3 |
| T value     | -3.67 | -3.82 | -2.98 | -3.15 | -3   | -4.03 | -1.07 | -1.48 | -1.49 | -1.48 | -1.47 | -0.69 |

**Supplementary Table 2. Primer sequences.**

| ID                    | Forward primer       | Reverse primer       |
|-----------------------|----------------------|----------------------|
| <b>eccDNA00290067</b> | CCTTTGAACTTGCCTGTGCC | AGCCATTTGAACCCCGTTCT |
| <b>eccDNA00087397</b> | ATTGAGGGACGGAAAGGCAG | ATTGAGGGACGGAAAGGCAG |
| <b>eccDNA00199129</b> | TTCTCCTTCTGTTCCGGCAG | GCAGGAAGATGTGGAGACAG |
| <b>eccDNA00308443</b> | CCTCCTCCTGCCTACTCCTT | CCACTGAGGGCTTGATCAAT |

**Supplementary Table 3. The number of eccDNAs and ecDNAs in each sample.**

| Reads or count       | OP-1        | OP-2        | OP-3        | OP-4        | OP-5        | OP-6        | N-1         | N-2         | N-3         | N-4         | N-5         | N-6         |
|----------------------|-------------|-------------|-------------|-------------|-------------|-------------|-------------|-------------|-------------|-------------|-------------|-------------|
| Raw reads            | 222,931,690 | 181,936,082 | 178,309,534 | 186,710,110 | 249,405,122 | 234,999,100 | 199,049,546 | 180,378,962 | 178,980,704 | 179,698,948 | 182,324,782 | 261,230,834 |
| Clean reads          | 172,443,856 | 104,399,893 | 120,313,907 | 133,659,770 | 198,986,324 | 205,949,091 | 98,115,394  | 119,929,334 | 99,552,556  | 140,441,823 | 120,060,065 | 206,130,314 |
| eccDNA count         | 6,712       | 8,839       | 7,648       | 9,105       | 10,125      | 3,310       | 10,884      | 6,792       | 5,461       | 4,780       | 6,115       | 5,291       |
| ecDNA count          | 28          | 40          | 19          | 28          | 16          | 12          | 68          | 32          | 47          | 27          | 27          | 19          |
| eccDNA derived genes | 4,210       | 4,800       | 4,440       | 5,095       | 5,511       | 2,182       | 5,855       | 4,132       | 3,188       | 3,096       | 3,619       | 3,234       |
| ecDNA derived genes  | 695         | 1001        | 570         | 359         | 348         | 377         | 976         | 706         | 682         | 326         | 1,279       | 511         |

**Supplementary Table 4. The amount of significantly differentiated eccDNA/ecDNA.**

| eccDNA/ecDNA                     | N-1 count | N-2 count | N-3 count | N-4 count | N-5 count | N-6 count | OP-1 count | OP-2 count | OP-3 count | OP-4 count | OP-5 count | OP-6 count |
|----------------------------------|-----------|-----------|-----------|-----------|-----------|-----------|------------|------------|------------|------------|------------|------------|
| eccDNA (chrY:10960687-11028340)  | 8         | 4         | 12        | 0         | 7         | 0         | 0          | 0          | 0          | 0          | 0          | 0          |
| eccDNA (chr15:18360676-19640574) | 30        | 0         | 60        | 18        | 0         | 0         | 0          | 0          | 0          | 2          | 0          | 0          |
| eccDNA (chr15:18405162-19640574) | 5         | 0         | 33        | 0         | 3         | 12        | 0          | 0          | 0          | 0          | 0          | 0          |
| eccDNA (chr15:18910372-19640601) | 53        | 0         | 22        | 0         | 0         | 3         | 0          | 0          | 0          | 0          | 0          | 0          |

**Supplementary Table 5. The clean reads of significantly differentiated eccDNA/ecDNA.**

| <b>eccDNA/<br/>ecDNA</b>                    | <b>N-1 TPM</b> | <b>N-2 TPM</b> | <b>N-3 TPM</b> | <b>N-4 TPM</b> | <b>N-5 TPM</b> | <b>N-6 TPM</b> | <b>OP-1<br/>TPM</b> | <b>OP-2<br/>TPM</b> | <b>OP-3<br/>TPM</b> | <b>OP-4 TPM</b> | <b>OP-5<br/>TPM</b> | <b>OP-6<br/>TPM</b> |
|---------------------------------------------|----------------|----------------|----------------|----------------|----------------|----------------|---------------------|---------------------|---------------------|-----------------|---------------------|---------------------|
| eccDNA<br>(chrY:<br>10960687-<br>11028340)  | 58.7651963125  | 24.9081511925  | 143.046168151  | 0              | 55.2037412364  | 0              | 0                   | 0                   | 0                   | 0               | 0                   | 0                   |
| ecDNA<br>(chr 15:<br>18360676-<br>19640574) | 51369.8630137  | 0              | 111731.843575  | 3182.46110325  | 0              | 0              | 0                   | 0                   | 0                   | 663.349917081   | 0                   | 0                   |
| ecDNA<br>(chr 15:<br>18405162-<br>19640574) | 8561.64383562  | 0              | 61452.5139665  | 0              | 10638.2978723  | 2361.739815    | 0                   | 0                   | 0                   | 0               | 0                   | 0                   |
| ecDNA<br>(chr 15:<br>18910372-<br>19640601) | 90753.4346575  | 0              | 40968.3426443  | 0              | 0              | 590.434953749  | 0                   | 0                   | 0                   | 0               | 0                   | 0                   |
